# Supplementary material for: Anthropogenic and natural controls on atmospheric δ 13 C-CO 2 variations in the Yangtze River Delta: Insights from a carbon isotope modeling framework
Source: Copernicus journal article supplement (doi:10.5194/acp-2020-627), 2020-08-11
Supplement: Supplementary file 1 [file acp-2020-627-supplement.pdf]

**Online supplement for**

**Anthropogenic and natural controls on atmospheric  $\delta^{13}\text{C}$ -CO<sub>2</sub> variations in the Yangtze River Delta: Insights from a carbon isotope modeling framework**

Cheng Hu<sup>\*</sup>, Jiaping Xu, Cheng Liu, Yan Chen, Dong Yang, Wenjing Huang, Lichen Deng, Shoudong Liu, Timothy J. Griffis<sup>\*\*</sup>, and Xuhui Lee

Correspondence:

<sup>\*</sup>Cheng Hu, College of Biology and the Environment, Joint Center for sustainable Forestry in Southern China, Nanjing Forestry University, Nanjing, 210037, China. [nihaocheng@163.com](mailto:nihaocheng@163.com) or [huxxx991@umn.edu](mailto:huxxx991@umn.edu)

<sup>\*\*</sup> Timothy J. Griffis, Department of Soil, Water, and Climate, University of Minnesota, St. Paul, MN 55108, [timgriffis@umn.edu](mailto:timgriffis@umn.edu)

**This document includes 2 tables and 4 figures:**

Method to derive  $\delta^{13}\text{C-CO}_2$  background

$$\delta_a^{13} \times C_a = \delta_s \times (C_a - C_b) + \delta_b \times C_b$$

The  $\delta_b$  background can be calculated based on above equation, here only  $C_b$  is not observed and with low bias as assessed before,  $\delta_s$  is the mixture of end-members by regional sources and it can be derived by independent Miller-Tans and keeling plots regressions approaches at monthly intervals, the nighttime (22:00-08:00)  $\delta_s$  will be used for this 2 approaches, see details of  $\delta_s$  calculations in Xu et al. (2017).  $C_a$  and  $\delta_a^{13}$  are observed atmospheric  $\text{CO}_2$  mixing ratio and  $^{13}\text{C}/^{12}\text{C}$  ratio.

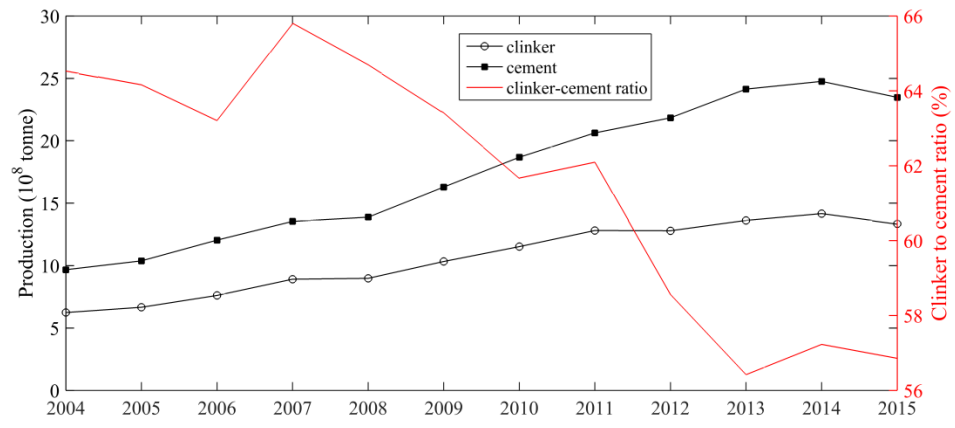

Figure S1. Annual productions of clinker and cement and their ratios in China.

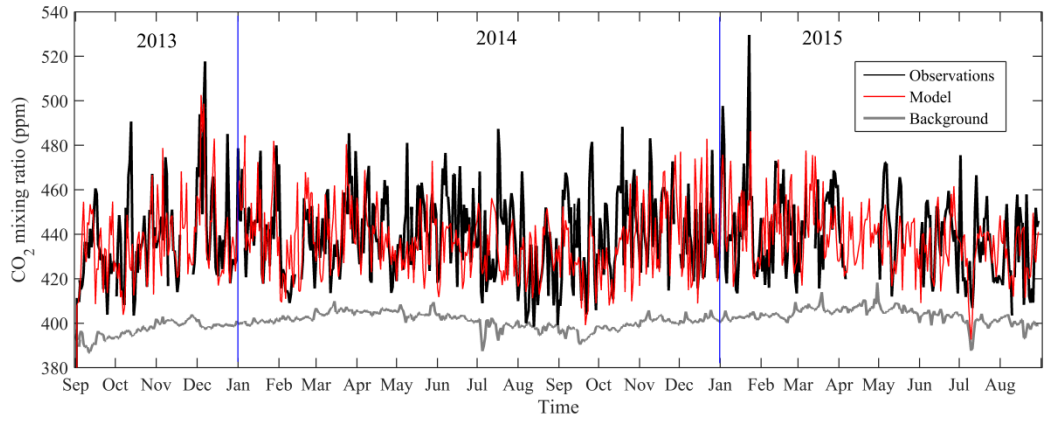

Figure S2. Daily comparisons of CO<sub>2</sub> mixing ratios.

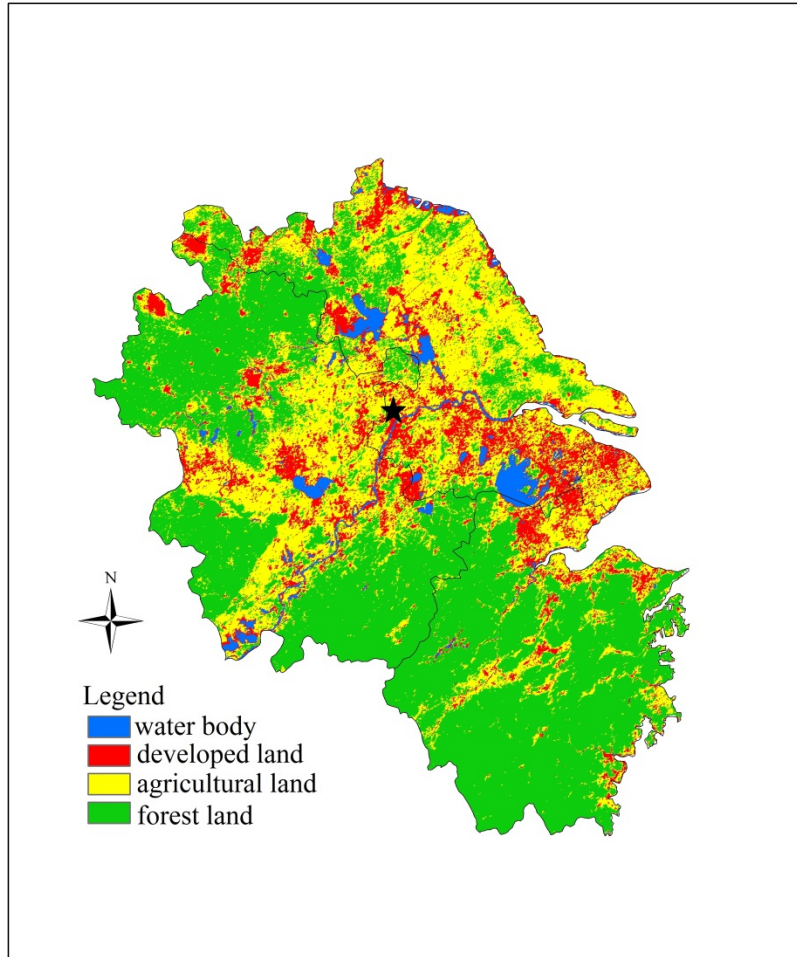

Figure S3. Land-Use and Land-Cover classification in Yangtze River Delta for 2014 was applied by using NDVI data of MOD13A2, '\*' indicate observation site.

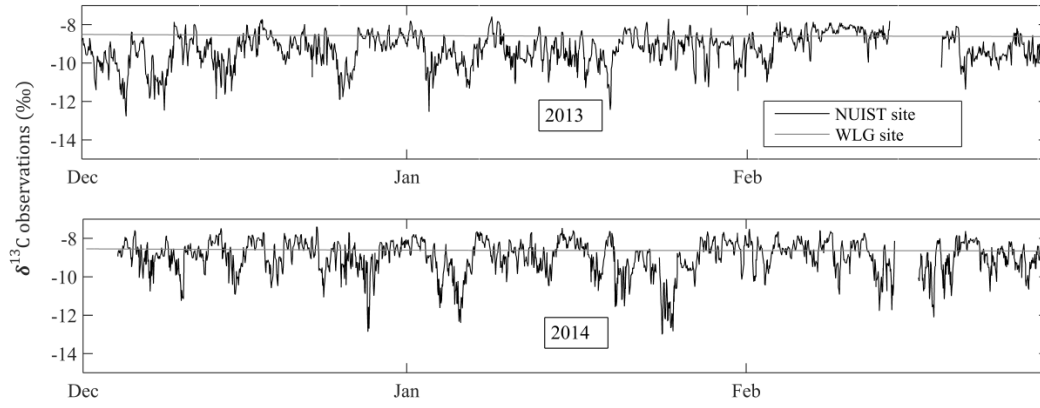

Figure S4.  $\delta^{13}\text{C}$  Comparison between NUIST and WLG sites.

Table S1. Difference of simulated monthly  $\delta^{13}\text{C}_{\text{ms}}$  between 2014 and 2015 for only anthropogenic sources.

|               | Jan  | Feb   | Mar   | Apr  | May   | Jun  | Jul  | Aug  | Sep   | Oct   | Nov   | Dec   |
|---------------|------|-------|-------|------|-------|------|------|------|-------|-------|-------|-------|
| Nighttime (‰) | 0.39 | -0.16 | -0.12 | 0.43 | -0.25 | 1.06 | 0.75 | 0.56 | -0.99 | -1.09 | 0.00  | -0.31 |
| All-day (‰)   | 0.23 | -0.14 | -0.17 | 0.35 | -0.25 | 0.32 | 0.67 | 0.20 | -0.94 | -0.95 | -0.07 | -0.22 |

Table S2. Comparisons between cement emission proportions and the simulated cement CO<sub>2</sub> enhancements proportions for different months in 2014 and 2015 (note the superscript 'a' indicates considering only anthropogenic CO<sub>2</sub> sources excluding biological signals, and the superscript 'b' indicates considering all CO<sub>2</sub> sinks/sources).

| Proportions                                                                               | Jan  | Feb  | Mar  | Apr   | May   | Jun   | Jul   | Aug   | Sep   | Oct  | Nov  | Dec  | Annual ave |
|-------------------------------------------------------------------------------------------|------|------|------|-------|-------|-------|-------|-------|-------|------|------|------|------------|
| EDGAR anthropogenic<br>( $\times 10^3 \text{ nmol}\cdot\text{m}^{-2}\cdot\text{s}^{-1}$ ) | 4.56 | 4.85 | 4.13 | 4.01  | 3.54  | 3.39  | 3.15  | 3.37  | 3.77  | 3.90 | 4.32 | 4.41 | 3.95       |
| EDGAR cement<br>( $\times 10^3 \text{ nmol}\cdot\text{m}^{-2}\cdot\text{s}^{-1}$ )        | 0.28 | 0.31 | 0.28 | 0.29  | 0.28  | 0.29  | 0.28  | 0.28  | 0.29  | 0.28 | 0.29 | 0.28 | 0.29       |
| Cement emission proportion (%)                                                            | 6.21 | 6.46 | 6.85 | 7.29  | 7.99  | 8.61  | 8.98  | 8.38  | 7.76  | 7.26 | 6.77 | 6.41 | 7.34       |
| <sup>a</sup> Cement concentration<br>proportion 2014 (%)                                  | 8.01 | 6.78 | 9.25 | 12.25 | 13.07 | 16.85 | 14.40 | 13.37 | 8.88  | 6.17 | 6.68 | 5.60 | 10.11      |
| <sup>a</sup> Cement concentration<br>proportion 2015 (%)                                  | 6.59 | 8.10 | 9.19 | 10.86 | 13.68 | 13.16 | 11.30 | 11.23 | 11.79 | 9.76 | 6.92 | 6.77 | 9.95       |
| <sup>b</sup> Cement concentration<br>proportion 2014 (%)                                  | 7.59 | 6.71 | 8.72 | 9.77  | 10.20 | 12.87 | 10.32 | 11.07 | 6.85  | 5.40 | 6.57 | 5.31 | 9.95       |
| <sup>b</sup> Cement concentration<br>proportion 2015 (%)                                  | 6.48 | 7.66 | 8.39 | 9.95  | 13.68 | 12.22 | 10.66 | 8.49  | 9.80  | 8.59 | 6.76 | 6.72 | 9.95       |
